# Supplementary material for: Potential of long-term satellite observations and reanalysis products for characterising soil drying: trends and drought events
Source: Copernicus journal article supplement (doi:10.5194/hess-29-397-2025), 2025-01-22
Supplement: Supplementary file 1 [file hess-29-397-2025-supplement.pdf]

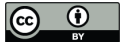

*Supplement of*

## **Potential of long-term satellite observations and reanalysis products for characterising soil drying: trends and drought events**

**Martin Hirschi et al.**

*Correspondence to:* Martin Hirschi ([martin.hirschi@env.ethz.ch](mailto:martin.hirschi@env.ethz.ch))

The copyright of individual parts of the supplement might differ from the article licence.

## Supplementary Information

**Table S1 Considered major drought events with pre-defined event regions and periods based on the cited references, serving as spatial and temporal bounds for the analysis. Events are ordered chronologically.**

| Region                             | Year      | Reference(s)                                       | Start time | End time   | Latitude extent | Longitude extent |
|------------------------------------|-----------|----------------------------------------------------|------------|------------|-----------------|------------------|
| <b>Seasonal, sub-annual events</b> |           |                                                    |            |            |                 |                  |
| Europe                             | 2003      | García-Herrera et al. (2010)                       | 10/06/2003 | 20/08/2003 | 42° N-53° N     | 0°-20° E         |
| SE-Europe                          | 2007      | Founda and Giannakopoulos (2009)                   | 01/05/2007 | 01/08/2007 | 36° N-52° N     | 20° E-45° E      |
| Western Russia                     | 2010      | Barriopedro et al. (2011), Hauser et al. (2016)    | 10/07/2010 | 20/08/2010 | 50° N-60° N     | 35° E-55° E      |
| Texas                              | 2011      | Rupp et al. (2012)                                 | 01/03/2011 | 31/08/2011 | 25° N-37° N     | 93° W-107° W     |
| Iberian Peninsula                  | 2011-2012 | Trigo et al. (2013)                                | 01/09/2011 | 31/08/2012 | 35.9° N-43.9° N | 10° W-3.5° E     |
| Great Plains                       | 2012      | Hoerling et al. (2014)                             | 01/04/2012 | 30/09/2012 | 31° N-46° N     | 82° W-114° W     |
| Europe                             | 2013      | Dong et al. (2014)                                 | 01/06/2013 | 31/08/2013 | 35° N-60° N     | 10° W-17° E      |
| Horn of Africa                     | 2013-2014 | Marthews et al. (2015)                             | 01/10/2013 | 30/06/2014 | 1.75° N-6.5° N  | 36° E-42.3° E    |
| Middle East                        | 2014      | Bergaoui et al. (2015)                             | 01/01/2014 | 28/02/2014 | 30.5° N-33.5° N | 34° E-36.5° E    |
| East Africa                        | 2015      | Funk et al. (2016)                                 | 01/06/2015 | 30/09/2015 | 7° N-14° N      | 36.5° E-40.5° E  |
| Western Canada                     | 2015      | Szeto et al. (2016)                                | 01/03/2015 | 30/09/2015 | 48° N-61° N     | 113° W-139° W    |
| Europe                             | 2015      | Dong et al. (2016)                                 | 01/06/2015 | 31/07/2015 | 45° N-55° N     | 0°-35° E         |
| Southern Africa                    | 2015-2016 | Yuan et al. (2018)                                 | 01/11/2015 | 30/04/2016 | 10° S-35° S     | 10° E-40° E      |
| Southern Europe                    | 2017      | Masante et al. (2018b), Kew et al. (2019)          | 01/06/2017 | 30/09/2017 | 36° N-48° N     | 8° E-24° E       |
| Europe                             | 2018      | Masante et al. (2018a), Masante and Vogt (2018)    | 01/06/2018 | 30/09/2018 | 45° N-68° N     | 10° W-35° E      |
| Europe                             | 2020      | Barbosa et al. (2020)                              | 01/03/2020 | 31/08/2020 | 40° N-68° N     | 10° W-35° E      |
| Europe                             | 2022      | Schumacher et al. (2022); Schumacher et al. (2024) | 01/06/2022 | 30/09/2022 | 36° N-58° N     | 10° W-30° E      |

Table S2 Area fractions (in %) of wetting and drying trends within each product, as well as the respective area means of wetting and drying trends and the global mean trends (in  $\text{m}^3 \text{m}^{-3} (20 \text{ yr})^{-1}$ ). Values in bold are referred to in the manuscript text, best-estimate products are underlined (cf. Sect. 5.1). Note that trends are not masked for significance, but for common spatial coverage of the datasets. The values for the best-estimate products are based on the areas with trend direction consensus.

| Dataset                 | Wetting trends                |                                                 | Drying trends |                                                 | All trends                                      |               |
|-------------------------|-------------------------------|-------------------------------------------------|---------------|-------------------------------------------------|-------------------------------------------------|---------------|
|                         | area fraction                 | area mean                                       | area fraction | area mean                                       | global mean                                     |               |
|                         | %                             | $\text{m}^3 \text{m}^{-3} (20 \text{ yr})^{-1}$ | %             | $\text{m}^3 \text{m}^{-3} (20 \text{ yr})^{-1}$ | $\text{m}^3 \text{m}^{-3} (20 \text{ yr})^{-1}$ |               |
| Surface soil moisture   | ESA-CCI-ACT                   | <b>63.8</b>                                     | 0.041         | 33.9                                            | -0.037                                          | 0.013         |
|                         | <u>ESA-CCI-COM</u>            | 40.9                                            | 0.019         | <b>59.1</b>                                     | -0.017                                          | -0.002        |
|                         | ESA-CCI-PAS                   | 50.9                                            | 0.034         | 49.0                                            | -0.037                                          | -0.001        |
|                         | ERA5                          | 34.8                                            | 0.022         | <b>65.2</b>                                     | -0.028                                          | -0.010        |
|                         | <u>ERA5-Land</u>              | 34.8                                            | 0.022         | <b>65.2</b>                                     | -0.029                                          | -0.011        |
|                         | MERRA-2                       | <b>59.0</b>                                     | 0.033         | 41.0                                            | -0.030                                          | 0.007         |
|                         | <i>Best-estimate products</i> | <b>21.1</b>                                     | <i>0.012</i>  | <b>49.3</b>                                     | <i>-0.015</i>                                   | <i>-0.007</i> |
| Root-zone soil moisture | <u>ESA-CCI-COM-RZSM</u>       | 41.7                                            | 0.017         | <b>58.3</b>                                     | -0.015                                          | -0.002        |
|                         | ERA5                          | 41.3                                            | 0.028         | <b>58.7</b>                                     | -0.029                                          | -0.005        |
|                         | <u>ERA5-Land</u>              | 42.2                                            | 0.020         | <b>57.8</b>                                     | -0.026                                          | -0.007        |
|                         | MERRA-2                       | <b>62.1</b>                                     | 0.024         | 37.9                                            | -0.025                                          | 0.006         |
|                         | <i>Best estimate products</i> | <b>20.6</b>                                     | <i>0.012</i>  | <b>44.5</b>                                     | <i>-0.015</i>                                   | <i>-0.006</i> |

Table S3 Validation of global patterns of precipitation and temperature trends. Metrics are based on the comparison to trends in CRU gridded observations (cf. Fig. 2). Note that ERA5-Land is forced by ERA5 precipitation and numbers are thus not shown for the former (denoted NA in the table).

|               | Metric                                                | ERA5   | ERA5-Land | MERRA-2 |
|---------------|-------------------------------------------------------|--------|-----------|---------|
| Precipitation | Correlation                                           | 0.33   | NA        | 0.34    |
|               | Mean bias ( $\text{mm d}^{-1} (20 \text{ yr})^{-1}$ ) | -0.004 | NA        | 0.171   |
|               | RMSD ( $\text{mm d}^{-1} (20 \text{ yr})^{-1}$ )      | 0.492  | NA        | 0.847   |
| Temperature   | Correlation                                           | 0.65   | 0.7       | 0.65    |
|               | Mean bias ( $\text{K} (20 \text{ yr})^{-1}$ )         | 0.221  | 0.238     | -0.219  |
|               | RMSD ( $\text{K} (20 \text{ yr})^{-1}$ )              | 0.536  | 0.511     | 0.613   |

**Table S4 Overview of characteristics of the Europe 2022 drought event as represented by surface and root-zone soil moisture of the different products. The metrics represent the area mean over the respective core of the event region for severity, magnitude and duration, and the temporal maximum for the spatial extent of the event. Also noted is the range of these metrics based on all products.**

|                                | <b>Dataset</b>       | <b>Severity</b>       | <b>Magnitude</b>   | <b>Duration</b> | <b>Extent</b>               |
|--------------------------------|----------------------|-----------------------|--------------------|-----------------|-----------------------------|
|                                |                      | <b>[1]</b>            | <b>[1]</b>         | <b>[days]</b>   | <b>[1e6 km<sup>2</sup>]</b> |
| <b>Surface soil moisture</b>   | ESA-CCI-ACT          | -34.0                 | -2.2               | 18              | 0.56                        |
|                                | ESA-CCI-COM          | -67.4                 | -2.8               | 33              | 1.34                        |
|                                | ESA-CCI-PAS          | -55.9                 | -2.6               | 29              | 1.21                        |
|                                | ERA5                 | -66.2                 | -2.6               | 33              | 1.17                        |
|                                | ERA5-Land            | -67.6                 | -2.7               | 33              | 1.16                        |
|                                | MERRA-2              | -103.3                | -2.7               | 52              | 1.22                        |
|                                | <i>Product range</i> | <i>[-103.3,-34.0]</i> | <i>[-2.8,-2.2]</i> | <i>[18,52]</i>  | <i>[0.6,1.3]</i>            |
| <b>Root-zone soil moisture</b> | ESA-CCI-COM-RZSM     | -107.6                | -2.3               | 55              | 0.90                        |
|                                | ERA5                 | -126.4                | -2.3               | 66              | 1.09                        |
|                                | ERA5-Land            | -78.9                 | -2.0               | 45              | 0.71                        |
|                                | MERRA-2              | -92.2                 | -2.1               | 51              | 0.83                        |
|                                | <i>Product range</i> | <i>[-126.4,-78.9]</i> | <i>[-2.3,-2.0]</i> | <i>[45,66]</i>  | <i>[0.7,1.1]</i>            |

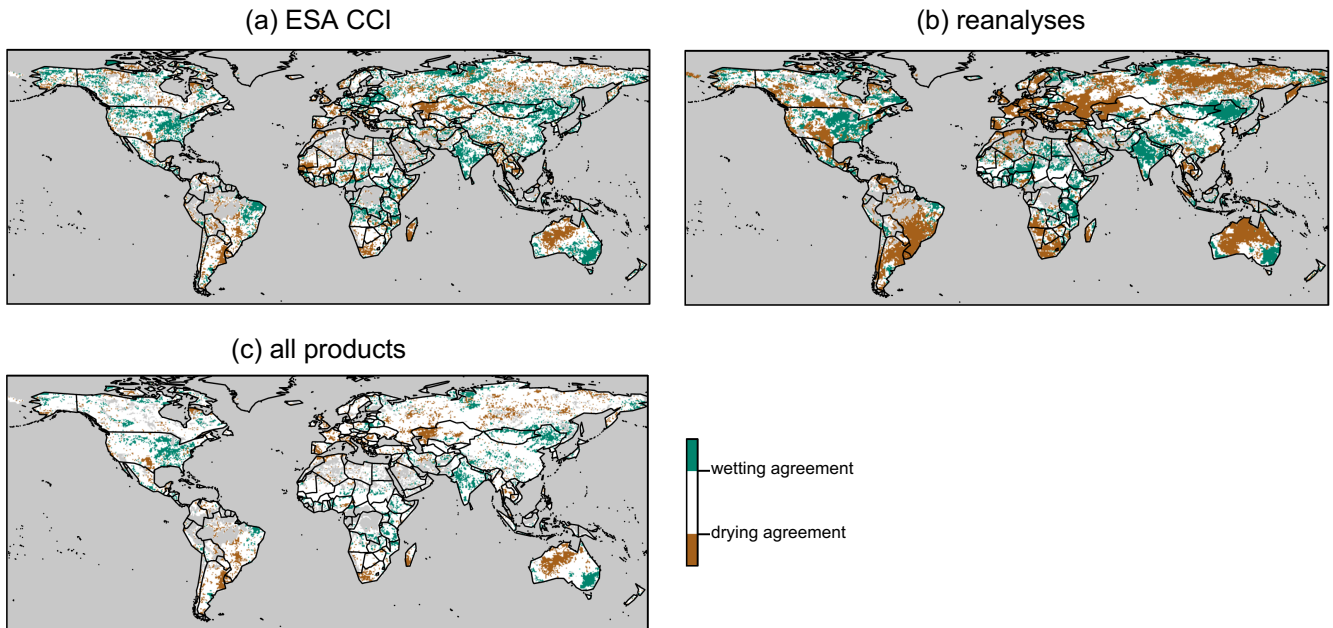

**Figure S1** Agreement in the trend direction of surface soil moisture within (a) the ESA CCI soil moisture products, (b) the ERA5, ERA5-Land and MERRA-2 reanalyses, and (c) all considered remote-sensing and reanalysis products. Brown colour denotes areas with drying trend agreement, green colour areas with wetting trend agreement, and white colour areas with no consensus in trend direction. Note that trends are not masked for significance.

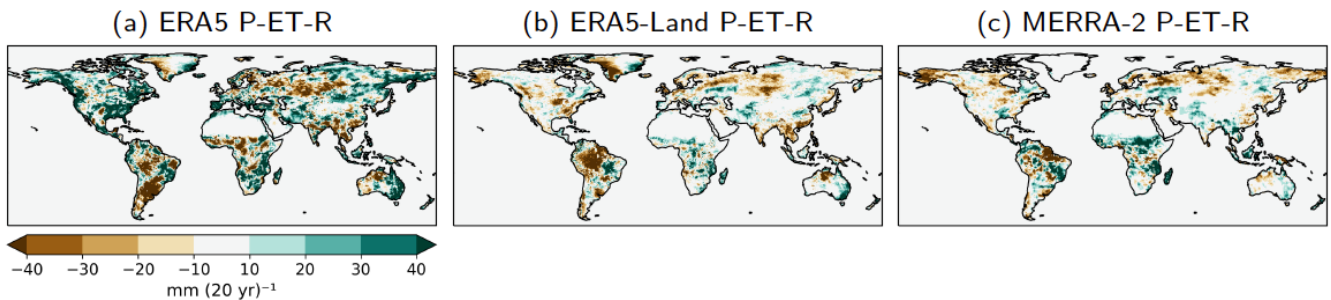

**Figure S2** As Fig. 3 of the main manuscript, but for Theil-Sen trends on yearly means of the cumulated monthly terrestrial water balance (i.e., precipitation minus evapotranspiration minus runoff). The terrestrial water balance is cumulated on annual basis.

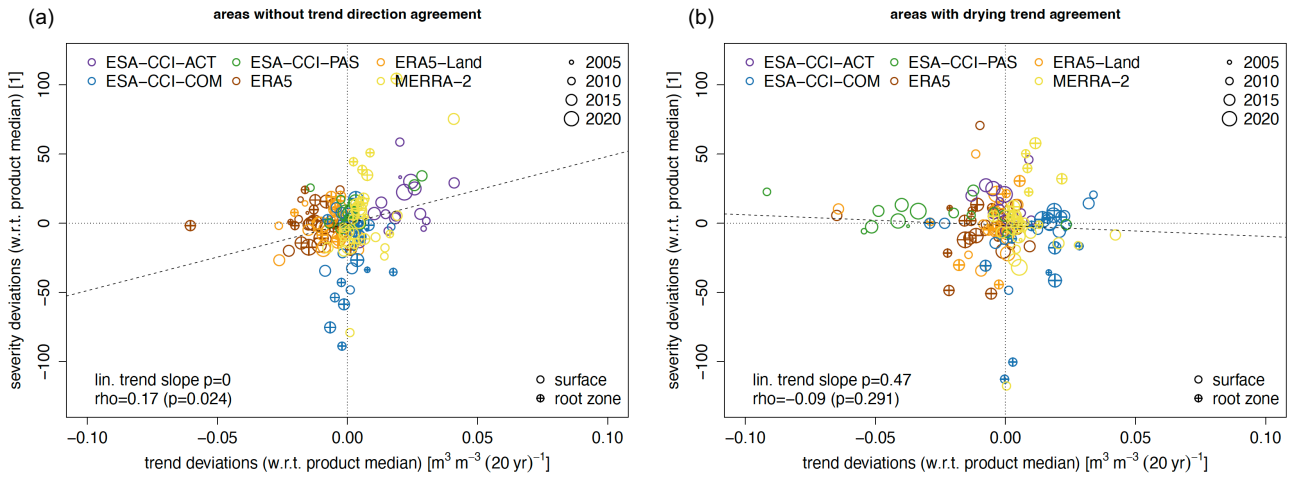

**Figure S3** As Fig. 11 of the main manuscript, but for product deviations in drought severity as a function of product deviations in the 2000–2022 soil moisture trends.

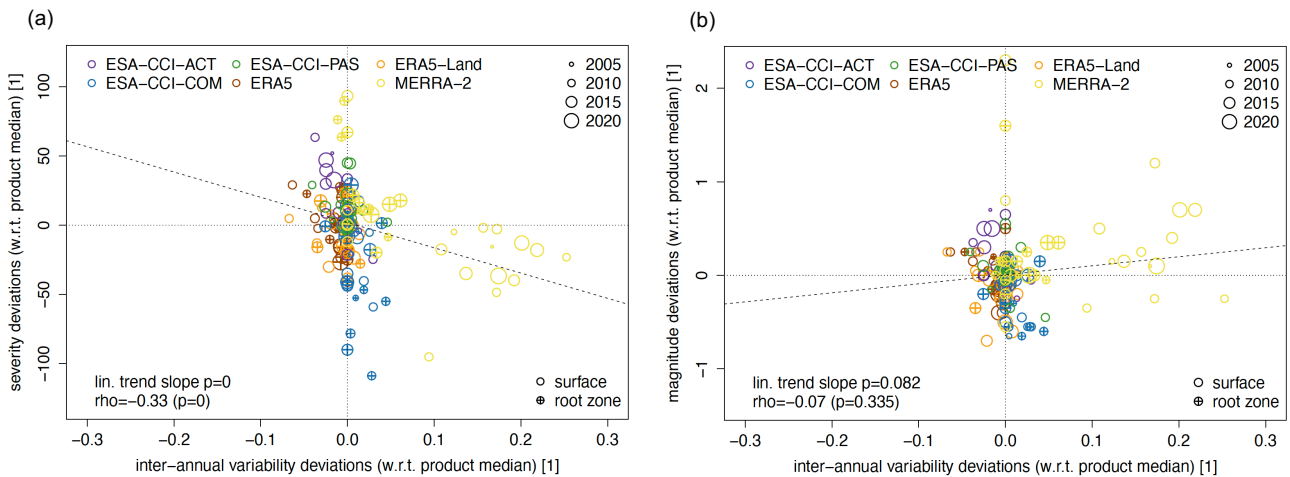

**Figure S4** Product deviations in (a) drought severity and (b) magnitude as a function of product deviations in the inter-annual variability of the standardised soil moisture anomalies. The inter-annual variability is characterised by the standard deviation of the annual mean standardised soil moisture anomalies of the 2000–2022 period, which are detrended using a LOWESS filter. Deviations are displayed with respect to the product median of the individual events, separately calculated for the surface and the root zone (the latter additionally indicated with a “+”), with circle sizes depending on the chronology of the events within the investigated period (i.e., later events are displayed with larger circles). The inter-annual variability and drought metrics are averaged over the respective drought regions. The p-values of the linear trend slope (dashed line) and the Spearman rank correlation rho between the drought metrics and the soil moisture trends are noted as well.

## References

- Barbosa, P., Masante, D., Arias Muñoz, C., Cammalleri, C., De Jager, A., Magni, D., Mazzeschi, M., McCormick, N., Naumann, G., Spinoni, J., and Vogt, J.: Drought in Europe – September 2020, Copernicus EMS – European Drought Observatory (EDO);, [https://edo.jrc.ec.europa.eu/documents/news/EDODroughtNews202009\\_Europe.pdf](https://edo.jrc.ec.europa.eu/documents/news/EDODroughtNews202009_Europe.pdf), 15-09-2023, 2020.
- Barriopedro, D., Fischer, E. M., Luterbacher, J., Trigo, R. M., and García-Herrera, R.: The Hot Summer of 2010: Redrawing the Temperature Record Map of Europe, *Science*, 332, 220-224, 10.1126/science.1201224, 2011.
- Bergaoui, K., Mitchell, D., Otto, F., Allen, M., Zaaboul, R., and McDonnell, R.: The Contribution of Human-Induced Climate Change to the Drought of 2014 in the Southern Levant Region [in “Explaining Extreme Events of 2014 from a Climate Perspective”], *Bulletin of the American Meteorological Society*, 96, S66-S70, 10.1175/bams-d-15-00129.1, 2015.
- Dong, B., Sutton, R., and Shaffrey, L.: The 2013 hot, dry summer in Western Europe [in “Explaining Extreme Events of 2013 from a Climate Perspective”], *Bulletin of the American Meteorological Society*, 95, S61-S66, 10.1175/1520-0477-95.9.S1.1, 2014.
- Dong, B., Sutton, R., Shaffrey, L., and Wilcox, L.: The 2015 European heat wave [in “Explaining Extreme Events of 2015 from a Climate Perspective”], *Bulletin of the American Meteorological Society*, 97, S57-S62, 10.1175/BAMS-D-16-0140.1, 2016.
- Founda, D. and Giannakopoulos, C.: The exceptionally hot summer of 2007 in Athens, Greece - A typical summer in the future climate?, *Global Planet Change*, 67, 227-236, 10.1016/j.gloplacha.2009.03.013, 2009.
- Funk, C., Harrison, L., Shukla, S., Korecha, D., Magadzire, T., Husak, G., Galu, G., and Hoell, A.: Assessing the Contributions of Local and East Pacific Warming to the 2015 Droughts in Ethiopia and Southern Africa [in “Explaining Extreme Events of 2015 from a Climate Perspective”], *Bulletin of the American Meteorological Society*, 97, S75–S80, 10.1175/BAMS-D-16-0167.1, 2016.
- García-Herrera, R., Díaz, J., Trigo, R. M., Luterbacher, J., and Fischer, E. M.: A Review of the European Summer Heat Wave of 2003, *Critical Reviews in Environmental Science and Technology*, 40, 267-306, 10.1080/10643380802238137, 2010.
- Hauser, M., Orth, R., and Seneviratne, S. I.: Role of soil moisture versus recent climate change for the 2010 heat wave in western Russia, *Geophysical Research Letters*, 43, 2819-2826, 10.1002/2016gl068036, 2016.
- Hoerling, M., Eischeid, J., Kumar, A., Leung, R., Mariotti, A., Mo, K., Schubert, S., and Seager, R.: Causes and Predictability of the 2012 Great Plains Drought, *Bulletin of the American Meteorological Society*, 95, 269-282, 10.1175/Bams-D-13-00055.1, 2014.
- Kew, S. F., Philip, S. Y., Oldenborgh, G. J. v., Schrier, G. v. d., Otto, F. E. L., and Vautard, R.: The Exceptional Summer Heat Wave in Southern Europe 2017 [in “Explaining Extreme Events of 2017 from a Climate Perspective”], *Bulletin of the American Meteorological Society*, 100, S49–S53 10.1175/BAMS-D-18-0109.1, 2019.
- Marthews, T. R., Otto, F. E. L., Mitchell, D., Dadson, S. J., and Jones, R. G.: The 2014 Drought in the Horn of Africa: Attribution of Meteorological Drivers [in “Explaining Extreme Events of 2014 from a Climate Perspective”], *Bulletin of the American Meteorological Society*, 96, S83-S88, 10.1175/BAMS-D-15-00115.1, 2015.
- Masante, D. and Vogt, J.: Drought in Central-Northern Europe - August 2018, Copernicus European Drought Observatory, [http://edo.jrc.ec.europa.eu/documents/news/EDODroughtNews201808\\_Central\\_North\\_Europe.pdf](http://edo.jrc.ec.europa.eu/documents/news/EDODroughtNews201808_Central_North_Europe.pdf), 15-09-2023, 2018.
- Masante, D., Barbosa, P., and McCormick, N.: Drought in Central-Northern Europe - July 2018, Copernicus European Drought Observatory, [http://edo.jrc.ec.europa.eu/documents/news/EDODroughtNews201807\\_Central\\_North\\_Europe.pdf](http://edo.jrc.ec.europa.eu/documents/news/EDODroughtNews201807_Central_North_Europe.pdf), 15-09-2023, 2018a.

Masante, D., Vogt, J., McCormick, N., Cammalleri, C., Magni, D., and de Jager, A.: Severe drought in Italy – July 2017, Joint Research Centre, European Commission: European Drought Observatory (EDO), [https://edo.jrc.ec.europa.eu/documents/news/EDODroughtNews201707\\_Italy.pdf](https://edo.jrc.ec.europa.eu/documents/news/EDODroughtNews201707_Italy.pdf), 15-09-2023, 2018b.

Rupp, D. E., Mote, P. W., Massey, N., Rye, C. J., Jones, R., and Allen, M. R.: Did Human Influence on Climate Make the 2011 Texas Drought more Probable? [in: “Explaining Extreme Events of 2011 from a Climate Perspective”], *Bulletin of the American Meteorological Society*, 93, 1052-1054, 10.1175/bams-d-12-00021.1, 2012.

Schumacher, D. L., Zachariah, M., Otto, F., Barnes, C., Philip, S., Kew, S., Vahlberg, M., Singh, R., Heinrich, D., Arrighi, J., van Aalst, M., Hauser, M., Hirschi, M., Bessenbacher, V., Gudmundsson, L., Beaudoin, H. K., Rodell, M., Li, S. H., Yang, W. C., Vecchi, G. A., Harrington, L. J., Lehner, F., Balsamo, G., and Seneviratne, S. I.: Detecting the human fingerprint in the summer 2022 western-central European soil drought, *Earth System Dynamics*, 15, 131-154, 10.5194/esd-15-131-2024, 2024.

Schumacher, D. L., Zachariah, M., Otto, F., Barnes, C., Philip, S., Kew, S., Vahlberg, M., Singh, R., Heinrich, D., Arrighi, J., Aalst, M. v., Thalheimer, L., Raju, E., Hauser, M., Hirschi, M., Gudmundsson, L., Beaudoin, H. K., Rodell, M., Li, S., Yang, W., Vecchi, G. A., Vautard, R., Harrington, L. J., and Seneviratne, S. I.: High temperatures exacerbated by climate change made 2022 Northern Hemisphere soil moisture droughts more likely, *World Weather Attribution*, <https://www.worldweatherattribution.org/wp-content/uploads/WCE-NH-drought-scientific-report.pdf>, 15-09-2023, 2022.

Szeto, K., Zhang, X., White, R. E., and Brimelow, J.: The 2015 Extreme Drought in Western Canada [in “Explaining Extreme Events of 2015 from a Climate Perspective”], *Bulletin of the American Meteorological Society*, 97, S42-S45, 10.1175/BAMS-ExplainingExtremeEvents2015.1, 2016.

Trigo, R. M., Añel, J. A., Barriopedro, D., García-Herrera, R., Gimeno, L., Nieto, R., Castillo, R., Allen, M. R., and Massey, N.: The Record Winter Drought of 2011–12 in the Iberian Peninsula [In: “Explaining Extreme Events of 2012 from a Climate Perspective”], *Bulletin of the American Meteorological Society*, 94, S41-S45, 10.1175/BAMS-D-13-00085.1, 2013.

Yuan, X., Wang, L., and Wood, E. F.: Anthropogenic Intensification of Southern African Flash Droughts as Exemplified by the 2015/16 Season [in “Explaining Extreme Events of 2016 from a Climate Perspective”], *Bulletin of the American Meteorological Society*, 99, S86-S90, 10.1175/bams-d-17-0077.1, 2018.
